# Supplementary material
Source: publisher figshare collection journal article supplement (https://rs.figshare.com/ndownloader/files/13348142)
Supplement: Supplementary file 1 [file 13348142]

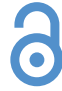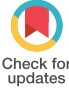

**Author for correspondence:**

Sachin Y. Shinde

e-mail: [sachin@iitk.ac.in](mailto:sachin@iitk.ac.in)

phone: +91 512 259 6939

# Physics of unsteady thrust and flow generation by a flexible surface flapping in the absence of free stream: Media Summary

Sachin Y. Shinde<sup>1</sup> and Jaywant H. Arakeri<sup>2</sup>

<sup>1,2</sup>Department of Mechanical Engineering, Indian Institute of Science, Bangalore-560012, India.

<sup>1</sup>Current address: Department of Mechanical Engineering, Indian Institute of Technology, Kanpur-208016, India.

Inspired by the flexible wings and fins of flying and swimming animals, we investigate the mechanism of flow and thrust generated by a flapping flexible surface in hover-like situation. Our analysis reveals that the orderly, narrow vortex jet and the associated thrust generated in an otherwise quiescent ambient is a two-dimensional analog of the three-dimensional flow structure in natural hovering; however, the mechanism is simple and different from the 'standard' mechanisms in birds and insects. We show that flexibility induces 'unsteady actuator disk (thin disk accelerating fluid by adding momentum-energy)' type action like the 'pulsed actuator disk' model (1984) proposed for hovering insects. Flapping flexible surfaces can have applications in electronic and room cooling.
